# Supplementary material
Source: PubMed Central journal article supplement (PMC3065116)
Supplement: NIHMS275472-supplement-1_si_001.pdf [file NIHMS275472-supplement-1_si_001.pdf]

**Supplementary materials – Flake et al., “Poly(ethylene glycol) microparticles produced by precipitation polymerization in aqueous solution”**

**Supplementary Figure 1**

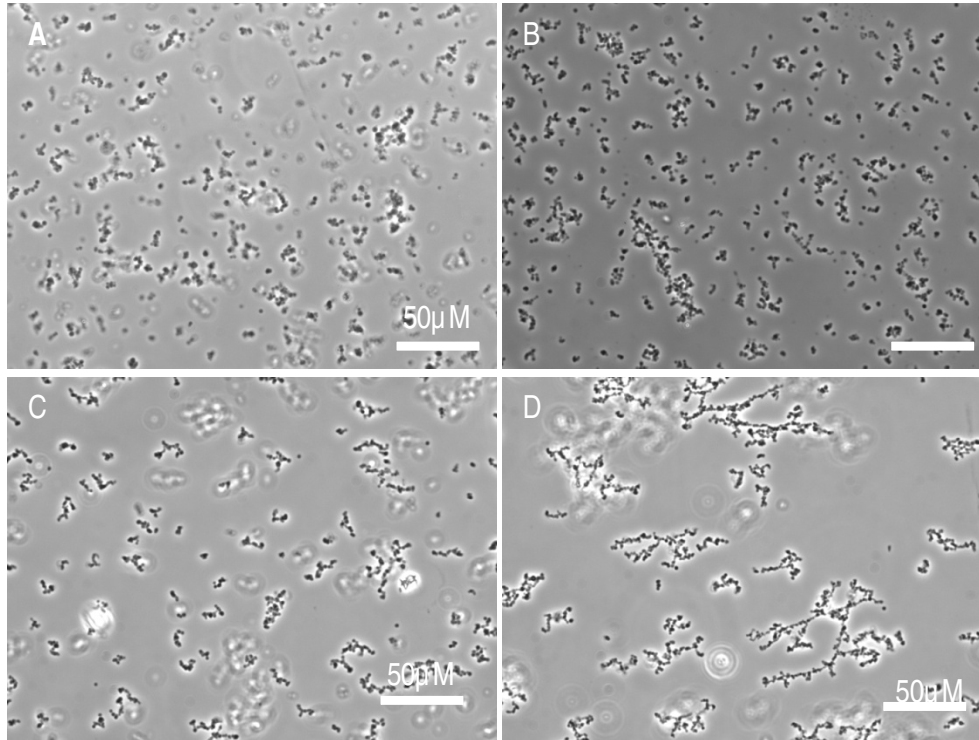

PEG-DAc microparticles were formed at various PEG-DAc 3400 concentrations and 525mM sodium sulfate using visible light photoinitiation. Phase contrast photomicrographs were taken with a 40X objective at PEG-DAc concentrations of: (A) 1.0%, (B) 1.6%, (C) 2.0%, and (D) 2.4% (w/v).

## Supplementary Figure 2

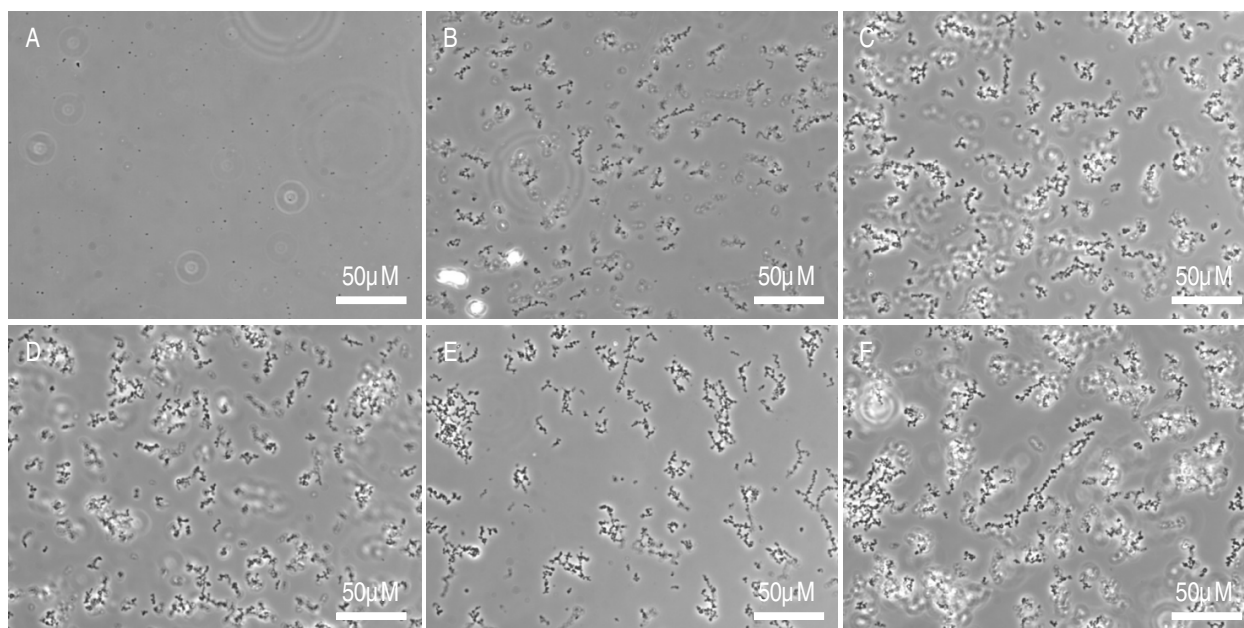

PEG-DAC microparticles were formed using 2% PEG-DAC 3400 solutions at various sodium sulfate concentrations by UV photoinitiation with DMPAP. Phase contrast photomicrographs were taken with a 40X objective with sodium sulfate concentrations of: (A) 350mM, (B) 360mM, (C) 380mM, (D) 400mM, (E) 420mM, and (F) 440mM.
